# Supplementary material for: A toxicogenomic approach for the risk assessment of the food contaminant acetamide
Source: PubMed Central journal article supplement (PMC7014822; doi:10.1016/j.taap.2019.114872), 2020-02-01
Supplement: mmc1.pdf [file mmc1.pdf]

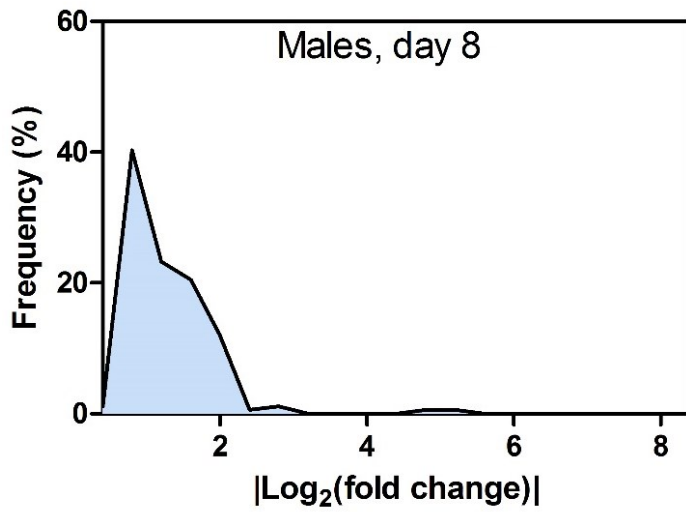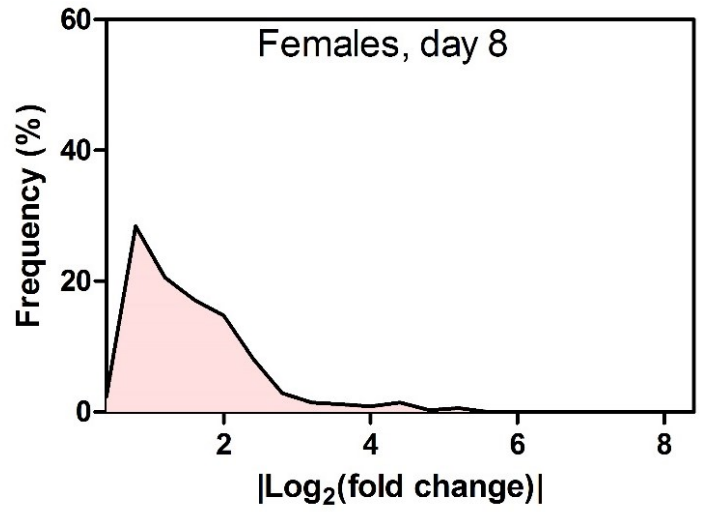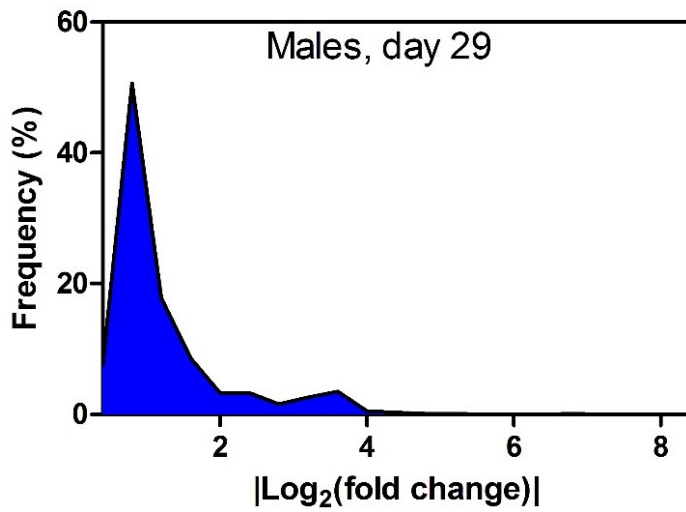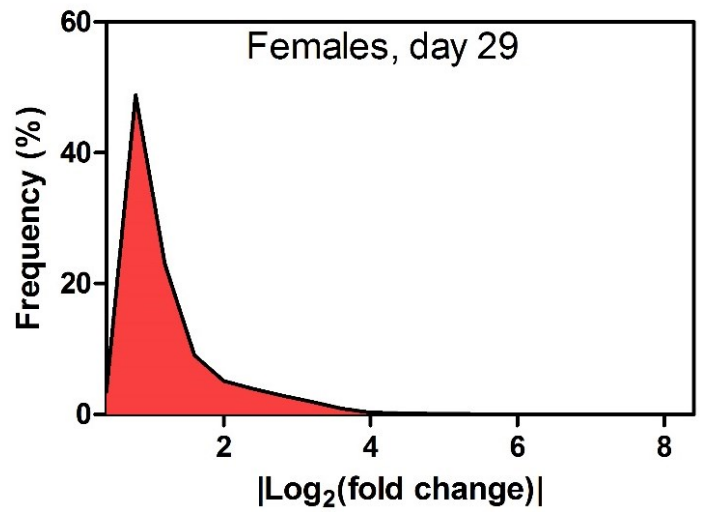

**Figure S1.** Frequency distribution of absolute fold changes of genes differentially expressed ( $|\text{fold change}| \geq 1.5$  &  $\text{FDR} \leq 0.05$ ) in Wistar rats gavaged daily with acetamide. Fold changes from the highest dose group (1500 mkd) was used to calculate frequency, expressed as percent of DEGs.
